# Supplementary material for: Detection, visualization and quantification of protein complexes in human Alzheimer’s disease brains using proximity ligation assay
Source: Springer Nature journal article supplement (doi:10.1038/s41598-023-38000-4), 2023-07-24
Supplement: MOESM1 [file 41598_2023_38000_MOESM1_ESM.pdf]

## SUPPLEMENTARY MATERIAL

### Proximity Ligation Assay: Detection, Visualization and Quantification of Protein Complexes in Human Alzheimer's Disease Brains

#### Figure Legend

**Table 1.** Samples demographics de-identified neuropathological information.

**Supplementary Figure 1.** Figure shows tau pathology in CA1 of the human hippocampus in “normal aging” non-AD brains compared to aging AD brains with clinically apparent cognitive impairment. A) Non-AD brain sections,  $n=4$  and B) AD brain sections,  $n=4$ . The two-channel merged representative images were produced from 10  $\mu\text{m}$  z-stack scanning projections with a step interval of 1  $\mu\text{m}$ . Nuclei were stained with DAPI (*blue*)  $\beta$ -amyloid aggregates and neuritic plaques, neurofibrillary tangles, and other tau aggregates with Thiazine Red (*red*). The scale bars are indicated.

**Supplementary Figure 2.** Summary schematic representation of PLA automated data analysis using the General Spot Measurement tool in HCS Studio software associated with the Cell Insight CX7 high-content imaging system. A and B) Quantification of p-tau (Ser202, Thr205)-ubiquitin PLA puncta per field in A) non-AD and B) AD. First, confocal images in RGB format (*left panel*) were split into green (MX-04 signal, *central upper panel*) and red (PLA signal, *central lower panel*) channels and converted to greyscale images using the Image module in the python imaging library Pillow (1, 2, 3). Greyscale images were converted from TIFF to DIB format using the Image Import and Conversion Tool in HCS Studio to generate a new 2 x 1 format. Wells A1 and B1 contained the AD images and non-AD images respectively. Samples were analyzed using the General Spot Measurement Tool in HCS Studio. Background removal was performed using the 3D Surface method. For object identification, uniform smoothing was applied to the red channel and a morphology-based detection method was implemented to identify PLA puncta. Fixed thresholding and shape-based segmentation were applied to improve the accuracy of spot detection. PLA puncta were validated by setting conservative intensity and length to width ratio (LWR) limits to eliminate aggregations and background. Yellow object masks indicate valid PLA puncta and orange blots indicate excluded PLA puncta (*right panel*). C) The AD field contains 1223 PLA puncta, whereas the non-AD field contains 155 PLA puncta.

**Table 1.** Samples demographics de-identified neuropathological information.

| <b>Case ID</b> | <b>Age at death / Sex</b> | <b>Primary clinical categorization</b> | <b>AD neuropathology. Braak &amp; Braak</b> | <b>Other neuropathologies</b>                   | <b>PMI</b> | <b>Cause of death</b>               | <b>Major comorbidities</b>                      |
|----------------|---------------------------|----------------------------------------|---------------------------------------------|-------------------------------------------------|------------|-------------------------------------|-------------------------------------------------|
| AD1            | 68/F                      | Alzheimer's disease                    | Severe (A3, B3, C3)                         | Mild CAA                                        | 15h        | Dementia                            | Depression                                      |
| AD2            | 70/M                      | Alzheimer's disease                    | Severe (A3, B3, C3)                         | Severe CAA                                      | 9.5h       | Dementia                            | None                                            |
| AD3            | 71/M                      | Alzheimer's disease                    | Severe (A3, B3, C3)                         | Severe CAA                                      | 24h        | Hemorrhage/ dementia                | Post-hemorrhage seizures, hypertension          |
| AD4            | 81/M                      | Alzheimer's disease                    | Mild (A2, B1, C2)                           | Severe CAA, 3cm hemorrhage                      | 19h        | Dementia/seizure                    | Atrial fibrillation                             |
| AD5            | 81/F                      | Alzheimer's disease                    | Severe (A3, B3, C3)                         | Severe CAA                                      | 36h        | Dementia                            | None                                            |
| AD6            | 81/F                      | Alzheimer's disease                    | Mild (staging not available)                | Severe CAA, remote subdural hemorrhage          | 48h        | Dementia                            | Atrial fibrillation, seizures, spinal stenosis. |
|                |                           |                                        |                                             |                                                 |            |                                     |                                                 |
| non-AD1        | 66/F                      | Neurological control                   | None                                        | None                                            | 33h        | Leukemia                            | COPD, liver transplant recipient                |
| non-AD2        | 72/M                      | Neurological control                   | None                                        | None                                            | 12h        | Acute respiratory distress syndrome | Renal failure, heart failure.                   |
| non-AD3        | 68/M                      | Neurological control                   | None                                        | None                                            | 24h        | Myocardial infarction               | Coronary artery disease                         |
| non-AD4        | 87/M                      | Non-AD control                         | None                                        | Stroke (contralateral hemisphere used in study) | 6h         | Stroke                              | Arteriolosclerosis                              |
| non-AD5        | 62/M                      | Neurological control                   | None                                        | None                                            | 11h        | Infection                           | Diabetes, hypertension, renal failure.          |
| non-AD6        | 68/M                      | Neurological control                   | None                                        | None                                            | 17h        | Infection                           | Diabetes, hypertension, heart failure.          |
| non-AD7        | 27/M                      | Neurological control                   | None                                        | None                                            | 11h        | Infection                           | Heart failure, pulmonary hypertension           |
| non-AD8        | 45/M                      | Non-AD                                 | None                                        | Stroke (contralateral hemisphere used in study) | 13h        | Stroke                              | Cerebral atherosclerosis, hypertension          |
| non-AD9        | 87/M                      | Neurological control                   | Rare amyloid plaques                        | None                                            | 12h        | Myocardial infarction               | Coronary artery disease and heart failure       |

**Supplementary Figure 1.** *Romero-Fernandez et al., 2023.* Proximity Ligation Assay: Detection, Visualization and Quantification of Protein Complexes in Human Alzheimer’s Disease Brains.

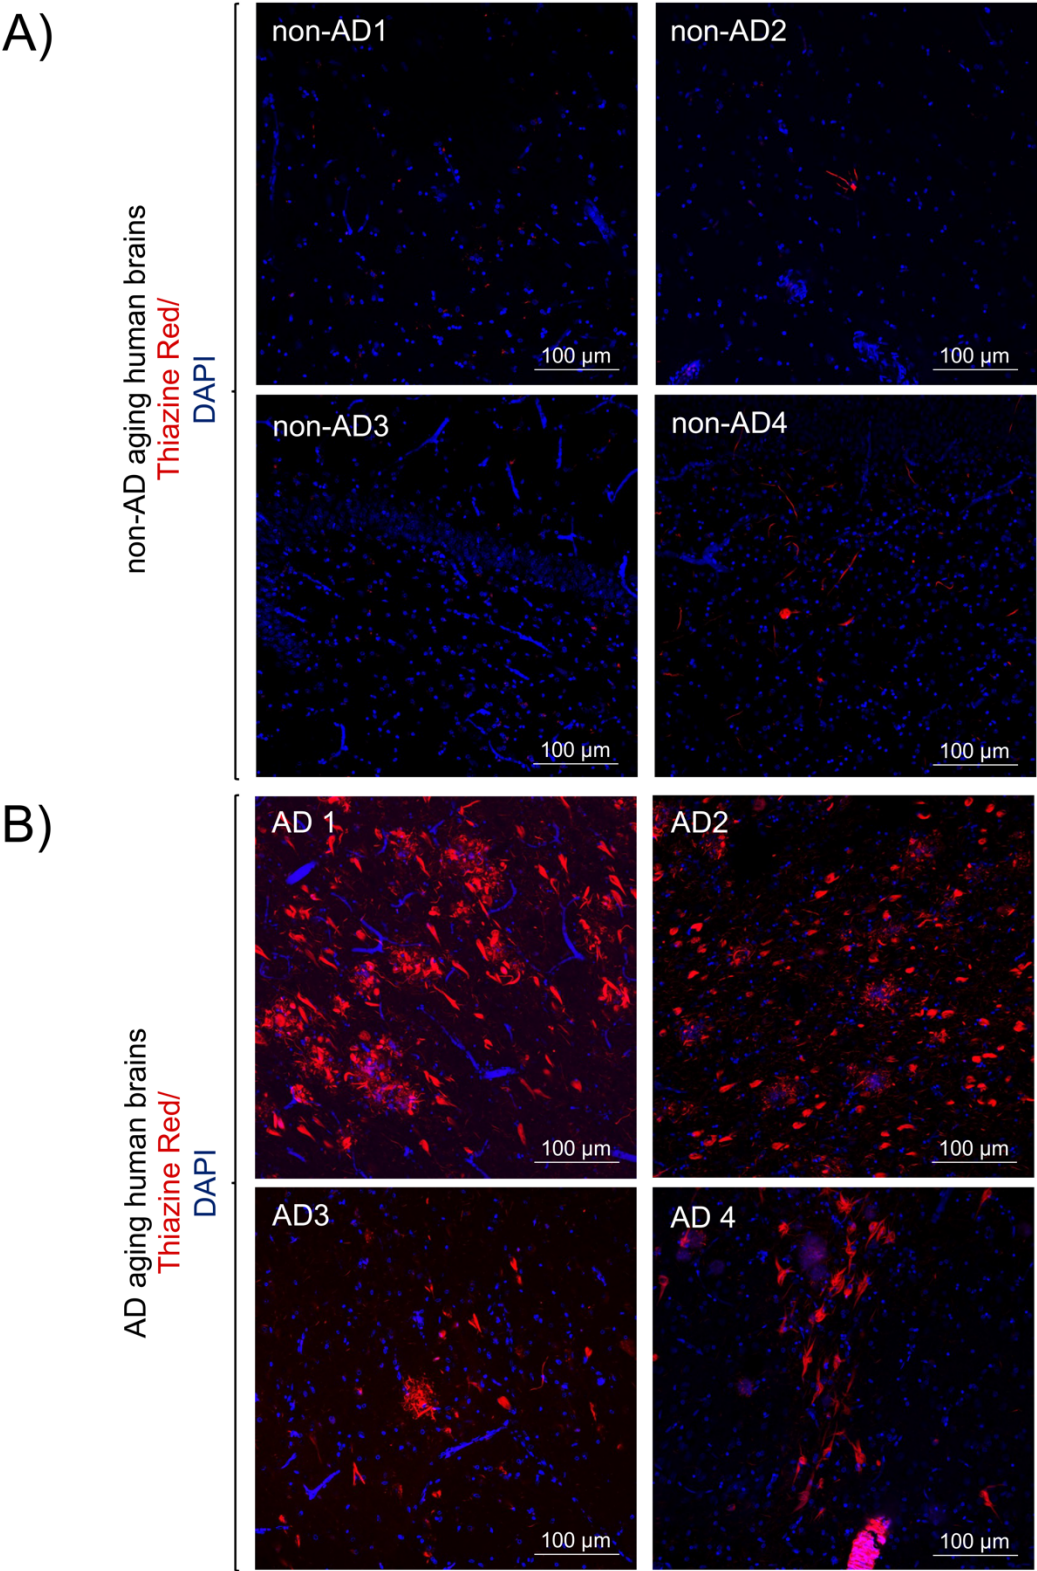

**Supplementary Figure 2.** *Romero-Fernandez et al., 2023.* Proximity Ligation Assay: Detection, Visualization and Quantification of Protein Complexes in Human Alzheimer’s Disease Brains.

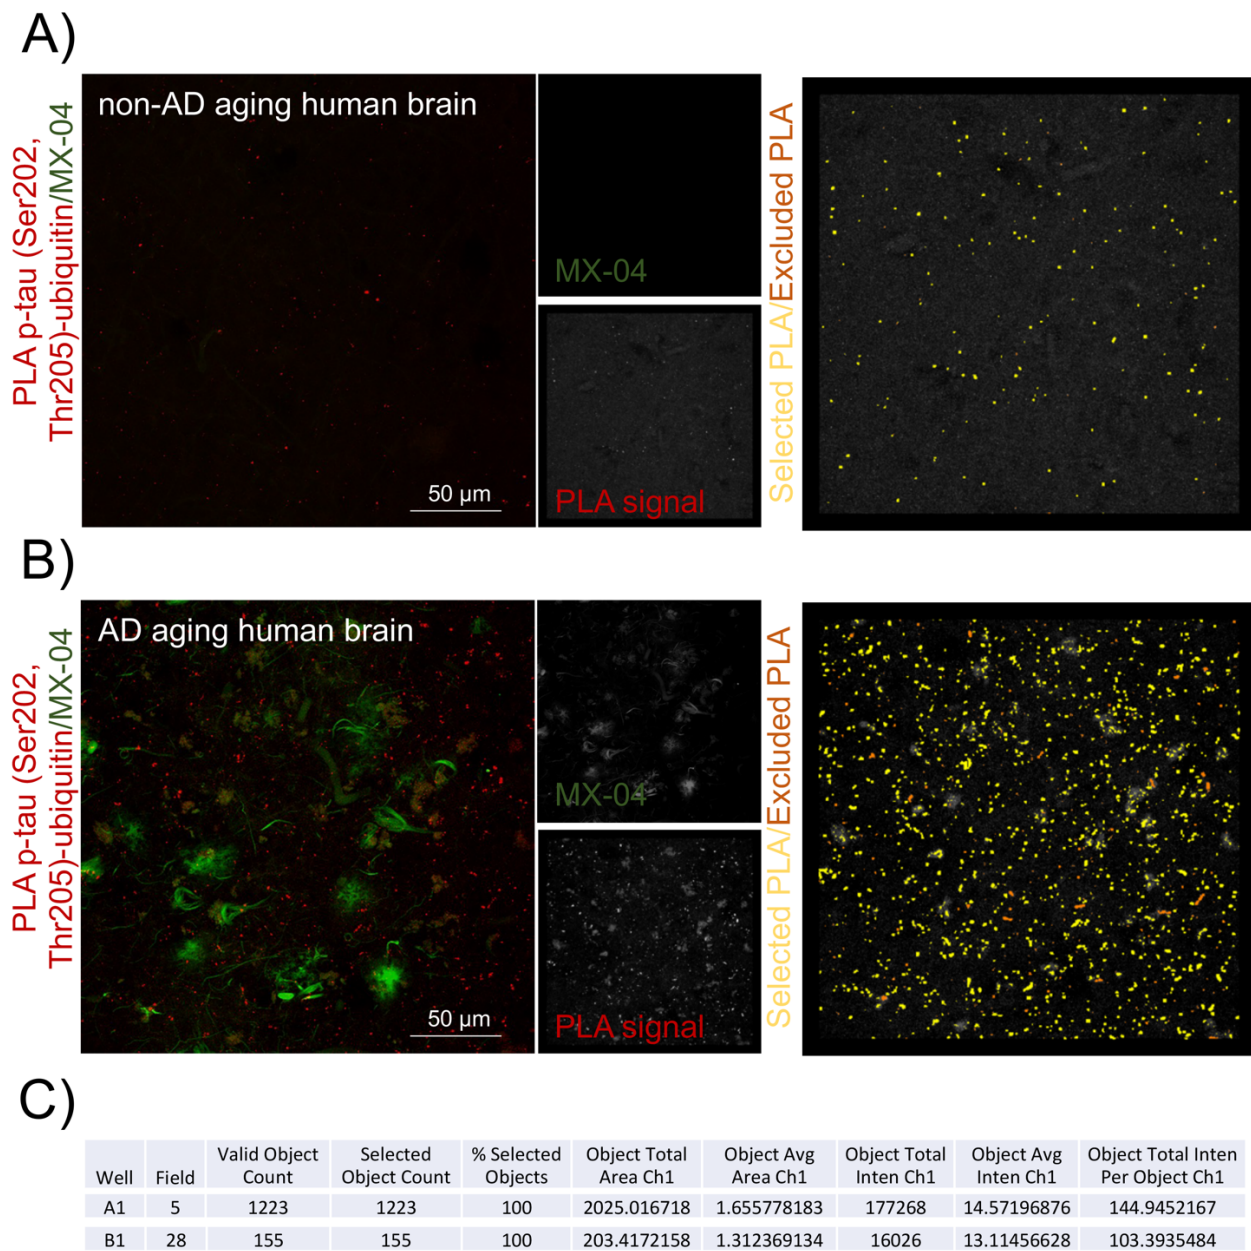

## References:

1. Harris CR, Millman KJ, van der Walt SJ, Gommers R, Virtanen P, Cournapeau D, et al. Array programming with NumPy. *Nature*. 2020;585(7825):357-62.
2. Van Rossum G, and Drake, F. L. . Python 3 Reference Manual: CreateSpace; 2009.
3. Clark A. Pillow (PIL Fork) Documentation: Readthedocs. Retrieved from <https://buildmedia.readthedocs.org/media/pdf/pillow/latest/pillow.pdf>; 2015.
